# Supplementary material for: Ti4+-immobilized chitosan-coated magnetic graphene oxide for the highly selective enrichment of phosphopeptides
Source: Royal Society of Chemistry journal article supplement (doi:10.1039/c6ay02905a), 2016-12-06
Supplement: c6ay02905a1.pdf [file c6ay02905a1.pdf]

# Supplementary material

## **Ti<sup>4+</sup>-immobilized chitosan coated magnetic graphene oxide for highly selective enrichment of phosphopeptides**

*Yiman Zhao, <sup>a</sup> Lingyi Zhang, <sup>a\*</sup> Zhanying Chu, <sup>a</sup> Zhichao Xiong, <sup>b</sup> Weibing Zhang <sup>a\*</sup>*

<sup>a</sup> Shanghai Key Laboratory of Functional Materials Chemistry, School of Chemistry & Molecular Engineering, East China University of Science and Technology, Shanghai 200237, (P.R. China).

<sup>b</sup> State Key Laboratory of High Performance Ceramics and Superfine Microstructure Shanghai Institute of Ceramics, Chinese Academy of Sciences Shanghai 200050 (P. R. China).

\*E-mail: weibingzhang@ecust.edu.cn. Tel: 86-21-64252145. Fax: 86-21 -64233161.

zhanglingyi@ecust.edu.cn.

## Supplementary material

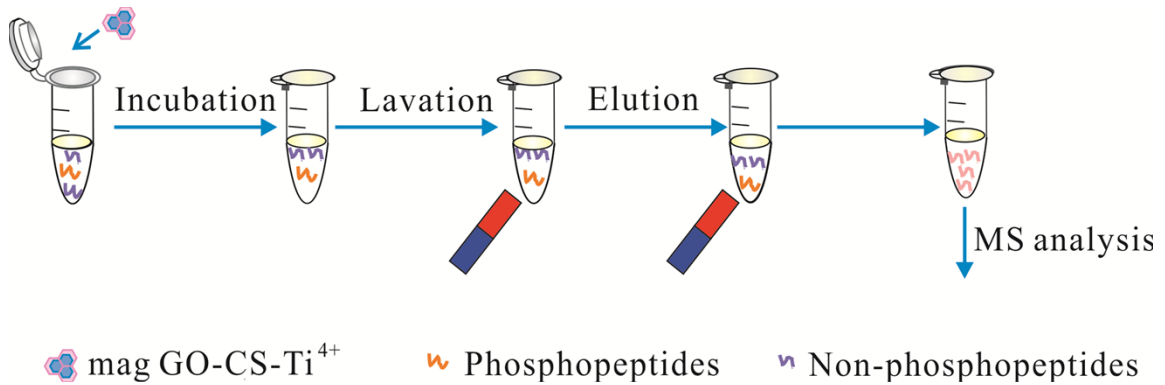

**Scheme S1.** Schematic illustration of the workflow of phosphopeptides enrichment from a biological sample by using mag GO-CS-Ti<sup>4+</sup>.

**Table S1.** Detailed information for the analysed phosphopeptides obtained from tryptic digests of  $\beta$ -casein after enrichment by mag GO-CS-Ti<sup>4+</sup> in MALDI-TOF MS analysis.

| No.       | Observed m/z | Peptides sequence                     | Number of phosphorylation |
|-----------|--------------|---------------------------------------|---------------------------|
| $\beta$ 1 | 2061.32      | FQ[pS]EEQQQTEDELQDK                   | 1                         |
| $\beta$ 2 | 2556.09      | FQ[pS]EEQQQTEDELQDKIHFP               | 1                         |
| $\beta$ 3 | 3122.27      | RELEELNVPGEIVE[pS]L[pS][pS][pS]EESITR | 4                         |

[pS], phosphorylated site.

**Table S2.** Detailed information for the observed phosphopeptides obtained from tryptic digests of  $\alpha$ -casein after enrichment by mag GO-CS-Ti<sup>4+</sup> in MALDI-TOF MS analysis.

| No.        | Observed m/z | Peptides sequence               | Number of phosphorylation |
|------------|--------------|---------------------------------|---------------------------|
| $\alpha$ 1 | 1237.07      | TVDME[pS]TEVF                   | 1                         |
| $\alpha$ 2 | 1337.28      | HIQKEDV[pS]ER                   | 1                         |
| $\alpha$ 3 | 1466.17      | TVDME[pS]TEVFIK                 | 1                         |
| $\alpha$ 4 | 1482.17      | TVD[Mo]E[pS]TEVFTK <sup>b</sup> | 1                         |
| $\alpha$ 5 | 1660.57      | VPQLEIVPN[pS]AEER               | 1                         |
| $\alpha$ 6 | 1847.5       | DIGSE[pS]TEDQAMEDIK             | 1                         |

|             |         |                                                    |   |
|-------------|---------|----------------------------------------------------|---|
| $\alpha 7$  | 1927.28 | DIG[pS]E[pS]TEDQAMEDIK                             | 2 |
| $\alpha 8$  | 1943.45 | DIG[pS]E[pS]TEDQA[Mo]EDIKa                         | 2 |
| $\alpha 9$  | 1951.72 | YKVPQLEIVPN[pS]AEER                                | 1 |
| $\alpha 10$ | 2061.61 | FQ[pS]EEQQQTEDELQDK                                | 1 |
| $\alpha 11$ | 2618.69 | NTMEHV[pS][pS][pS]EESII[pS]QETYK                   | 4 |
| $\alpha 12$ | 2677.47 | VNEL[pS]KDIG[pS]E[pS]TEDQAMEDIK                    | 3 |
| $\alpha 13$ | 2703.71 | Q*MEAE[pS]I[pS][pS][pS]EEIVPN[pS]VEAQ <sup>b</sup> | 5 |
| $\alpha 14$ | 2720.69 | QMEAE[pS]I[pS][pS][pS]EEIVPNPN[pS]VEQK             | 5 |
| $\alpha 15$ | 2934.98 | KEKVNEL[pS]KDIG[pS]E[pS]TEDQAMEDIKQ                | 3 |
| $\alpha 16$ | 3007.85 | NANEEYSIG[pS][pS][pS]EE[pS]AEVATEEVK               | 4 |

[pS], phosphorylated site.

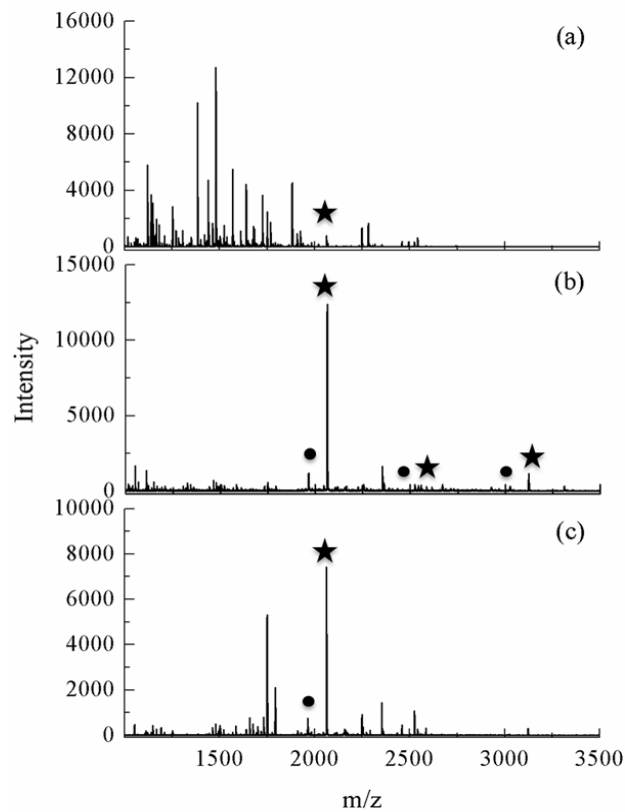

**Figure S1.** MALDI-TOF mass spectra of the tryptic digest mixture of  $\beta$ -casein (0.5 pmol) and BSA. (a) Direct analysis of the peptide mixture at a molar ratio of 1: 100; after enrichment by mag GO-CS-Ti<sup>4+</sup> at molar ratios of (b) 1: 100, (c) 1: 400. ★ indicates phosphopeptides and ● indicates dephosphorylated peptides.

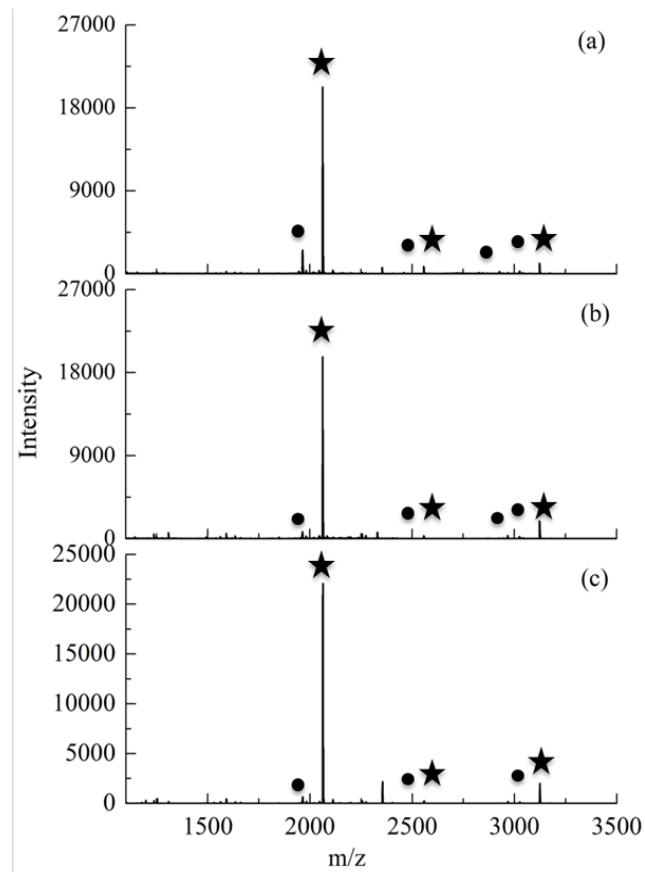

**Figure S2.** MALDI-TOF mass spectra of phosphopeptides enriched from  $\beta$ -casein digest (0.5 pmol) using mag GO-CS-Ti<sup>4+</sup>, (a) for the first time, (b) third time and c) for the sixth time. ★ indicates phosphopeptides and ● indicates dephosphorylated peptides.

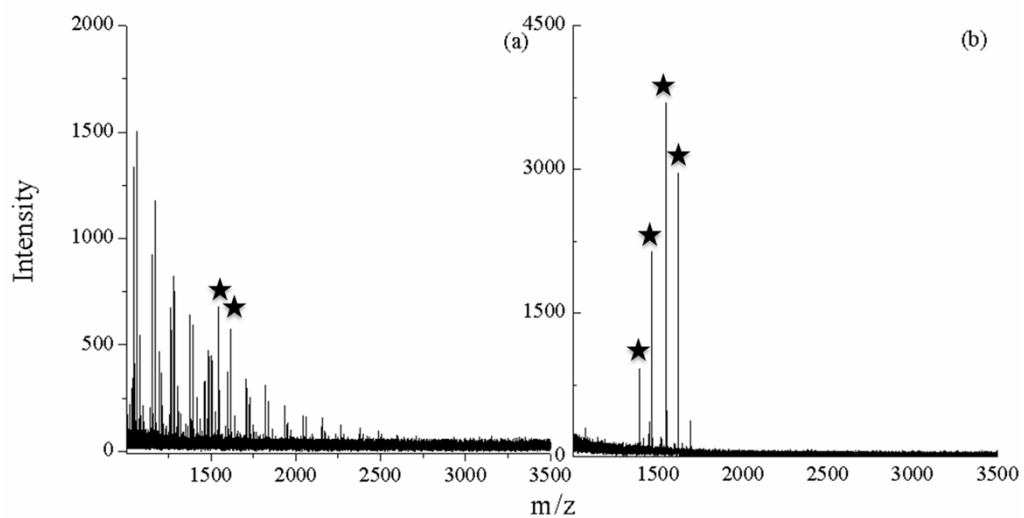

**Figure S3.** (a) and (b) MALDI-TOF spectrum of serum from an endometrial cancer pepople before and after enrichment by mag GO-CS-Ti<sup>4+</sup>, respectively. ★ indicates phosphorylated peptides.

**Table S3.** List of intensities of the selected phosphopeptide peak in  $\beta$ -casein captured by three batches of mag GO-CS-Ti<sup>4+</sup>.

| Selected Peak                  | Intensity |       |       | RSD(%) |
|--------------------------------|-----------|-------|-------|--------|
| $\beta$ -casein<br>m/z 2061.32 | 19938     | 21548 | 19709 | 4.91   |

**Table S4.** List of phosphopeptides from tryptic digests of proteins extracted from nonfat milk after enrichment by mag GO-CS-Ti<sup>4+</sup> in MALDI-TOF MS analysis.

| No. | Observed m/z | Peptides sequence                      | Number of phosphorylation |
|-----|--------------|----------------------------------------|---------------------------|
| 1   | 1466.24      | TVDME[pS]TEVFIK                        | 1                         |
| 2   | 1563.71      | TVD[Mo]E[pS]TEVFTK <sup>b</sup>        | 1                         |
| 3   | 1661.39      | VPQLEIVPN[pS]AEER                      | 1                         |
| 4   | 1854.21      | YLGEYLIVPN [pS]AEER                    | 1                         |
| 5   | 1927.28      | DIG[pS]E[pS]TEDQAMEDIK                 | 2                         |
| 6   | 1952.01      | YKVPQLEIVPN[pS]AEER                    | 1                         |
| 7   | 2062.61      | FQ[pS]EEQQQTEDELQDK                    | 1                         |
| 8   | 2080.37      | KKYKVPQLEIVPN[pS]AEERL                 | 1                         |
| 9   | 2555.65      | FQ[pS]EEQQQTEDELQDKIHPF                | 1                         |
| 10  | 2720.69      | QMEAE[pS]I[pS][pS][pS]EEIVPNPN[pS]VEQK | 5                         |
| 11  | 2965.46      | ELEELNVPGEIVE[pS]L[pS][pS][pS]EESITR   | 4                         |
| 12  | 3026.33      | NANEEYSIG[pS][pS][pS]EE[pS]AEVATEEVK   | 4                         |
| 13  | 3122.98      | RELEELNVPGEIVE[pS]L[pS][pS][pS]EESITR  | 4                         |

[pS], phosphorylated site.

**Table S5.** List of phosphopeptides enriched by mag GO-CS-Ti<sup>4+</sup> from human serum.

| No. | Observed m/z | Peptides sequence | Number of phosphorylation |
|-----|--------------|-------------------|---------------------------|
|-----|--------------|-------------------|---------------------------|

---

|   |         |                     |   |
|---|---------|---------------------|---|
| 1 | 1389.33 | D[pS]GEGDFLAEGGGV   | 1 |
| 2 | 1460.35 | AD[pS]GEGDFLAEGGGV  | 1 |
| 3 | 1545.43 | D[pS]GEGDFLAEGGGVR  | 1 |
| 4 | 1616.45 | AD[pS]GEGDFLAEGGGVR | 1 |

---

[pS], **phosphorylated site.**
